# Supplementary material for: Quaternary rare-earth selenides with closed cavities: Cs[RE9Mn4Se18] (RE = Ho–Lu)
Source: Royal Society of Chemistry journal article supplement (doi:10.1039/c4qi00202d), 2015-01-01
Supplement: c4qi00202d1.pdf [file c4qi00202d1.pdf]

*Electronic Supplementary Information*

**Quaternary Rare-Earth Selenides with Closed Cavities: Cs[RE<sub>9</sub>Mn<sub>4</sub>Se<sub>18</sub>] (RE = Ho–Lu)**

Hua Lin,<sup>a</sup> Jin-Ni Shen,<sup>a,b</sup> Yong-Fang Shi,<sup>a</sup> Long-Hua Li<sup>a</sup> and Ling Chen<sup>\*,a</sup>

<sup>a</sup> *Key Laboratory of Optoelectronic Materials Chemistry and Physics, Fujian Institute of Research on the Structure of Matter, Chinese Academy of Sciences, Fuzhou, Fujian 350002, People's Republic of China.*

<sup>b</sup> *University of Chinese Academy of Sciences, Beijing 100039, People's Republic of China*

\*To whom correspondence should be addressed. E-mail: chenl@fjirms.ac.cn. Tel: (011)86-591-63173131.

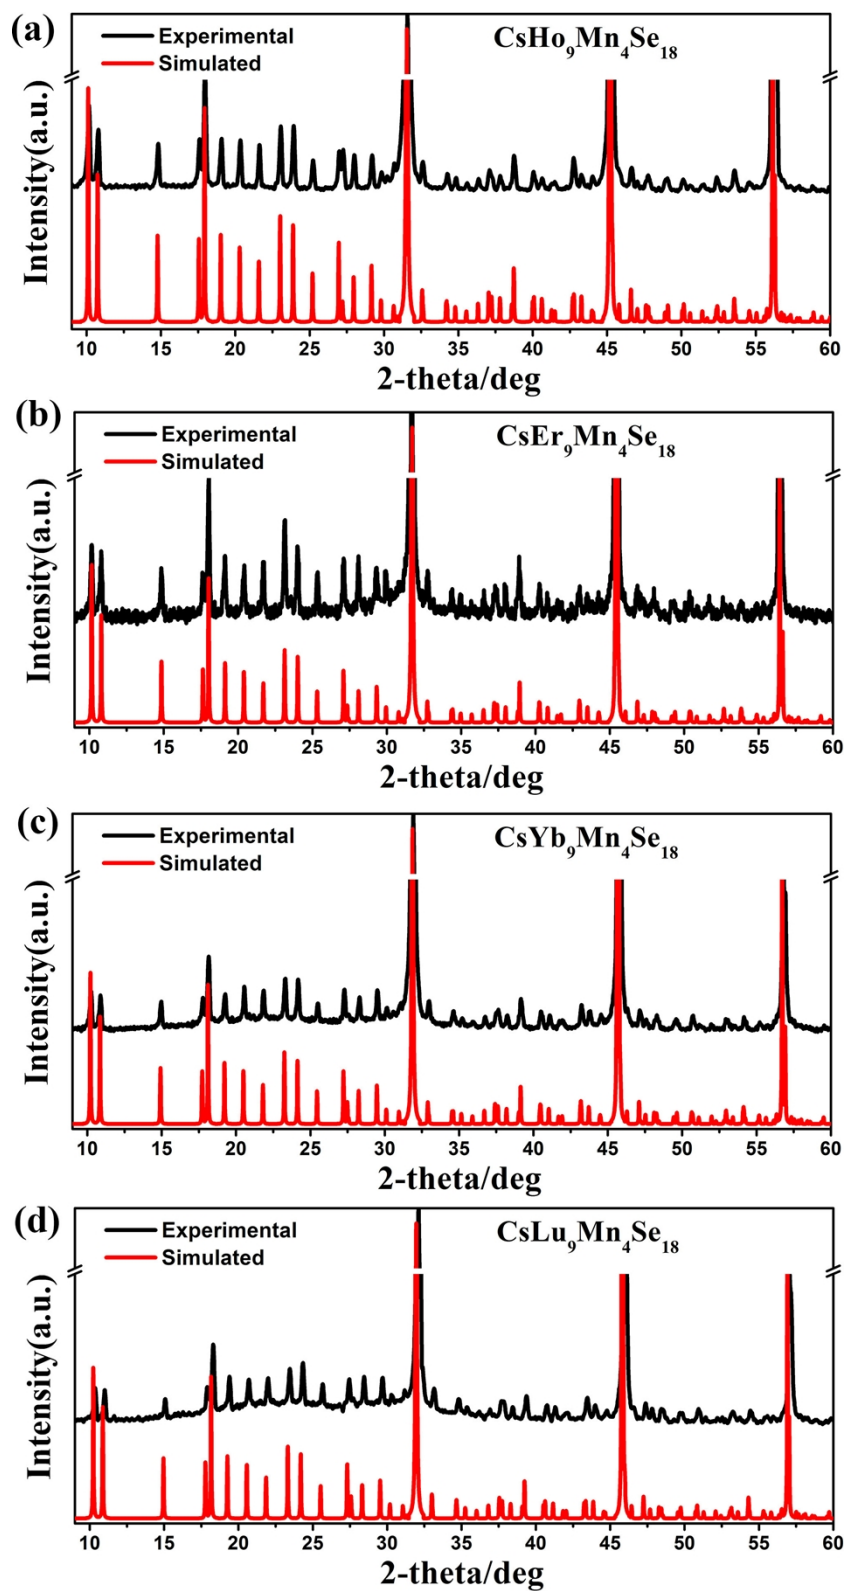

**Figure S1.** The experimental (black) and simulated (red) powder XRD patterns of  $\text{Cs}[\text{RE}_9\text{Mn}_4\text{Se}_{18}]$  (RE = Ho, Er, Yb, Lu).

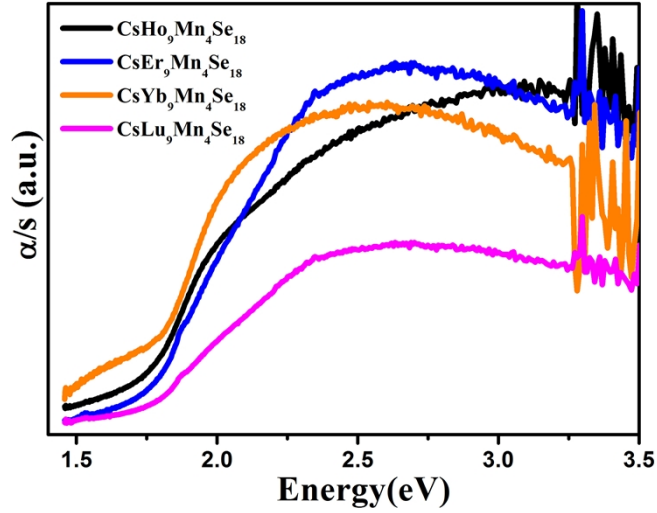

**Figure S2.** Optical absorption spectrum of Cs[RE<sub>9</sub>Mn<sub>4</sub>Se<sub>18</sub>] (RE = Ho, Er, Yb, Lu).

**Table S1.** The EDX data of Cs[Tm<sub>9</sub>Mn<sub>4</sub>Se<sub>18</sub>].

| Point-1 |         |         |         | Point-2                                                                                      |         |         |         |
|---------|---------|---------|---------|----------------------------------------------------------------------------------------------|---------|---------|---------|
| Element | Weight% | Atomic% | Formula | Element                                                                                      | Weight% | Atomic% | Formula |
| MnK     | 6.60    | 12.37   | 3.94    | Mn K                                                                                         | 6.55    | 12.29   | 3.95    |
| Se L    | 43.20   | 56.35   | 17.95   | Se L                                                                                         | 43.22   | 56.41   | 18.14   |
| Cs L    | 4.05    | 3.14    | 1       | Cs L                                                                                         | 4.01    | 3.11    | 1       |
| Tm L    | 46.15   | 28.14   | 8.97    | Tm L                                                                                         | 46.22   | 28.20   | 9.07    |
| Total   | 100.00  |         |         | Total                                                                                        | 100.00  |         |         |
| Point-3 |         |         |         | Point-4                                                                                      |         |         |         |
| Element | Weight% | Atomic% | Formula | Element                                                                                      | Weight% | Atomic% | Formula |
| Mn K    | 6.54    | 12.28   | 3.85    | Mn K                                                                                         | 6.85    | 12.82   | 4.16    |
| Se L    | 43.10   | 56.30   | 17.65   | Se L                                                                                         | 43.02   | 56.02   | 18.19   |
| Cs L    | 4.11    | 3.19    | 1       | Cs L                                                                                         | 3.98    | 3.08    | 1       |
| Tm L    | 46.25   | 28.24   | 8.85    | Tm L                                                                                         | 46.15   | 28.09   | 9.12    |
| Total   | 100.00  |         |         | Total                                                                                        | 100.00  |         |         |
| Point-5 |         |         |         | Average formula:<br><br>$\text{Cs}_1\text{Mn}_{4.0(1)}\text{Tm}_{9.1(3)}\text{Se}_{18.1(2)}$ |         |         |         |
| Element | Weight% | Atomic% | Formula |                                                                                              |         |         |         |
| Mn K    | 6.68    | 12.04   | 4.09    |                                                                                              |         |         |         |
| Se L    | 43.34   | 56.53   | 18.47   |                                                                                              |         |         |         |
| Cs L    | 3.95    | 3.13    | 1       |                                                                                              |         |         |         |
| Tm L    | 46.03   | 28.30   | 9.17    |                                                                                              |         |         |         |
| Total   | 100.00  |         |         |                                                                                              |         |         |         |

**Table S2.** Total energy  $\Delta E$  (in meV/atom) of each Mn-distribution configuration.

| Model- $ij$ ( $i = a, b, c; j = 1-6$ ) | $\Delta E$ (meV/atom) |        |
|----------------------------------------|-----------------------|--------|
| Figure 7a                              | $a1$                  | 0.00   |
|                                        | $a2$                  | 5.50   |
|                                        | $a3$                  | 20.03  |
|                                        | $a4$                  | 39.35  |
|                                        | $a5$                  | 31.73  |
|                                        | $a6$                  | 43.43  |
| Figure 7b                              | $b1$                  | 111.18 |
|                                        | $b2$                  | -18.95 |
|                                        | $b3$                  | 45.47  |
|                                        | $b4$                  | 59.26  |
|                                        | $b5$                  | -34.77 |
|                                        | $b6$                  | 36.15  |
| Figure 7c                              | $c1$                  | -28.40 |
|                                        | $c2$                  | -33.32 |
|                                        | $c3$                  | -34.68 |
|                                        | $c4$                  | -33.19 |
|                                        | $c5$                  | -34.67 |
|                                        | $c6$                  | -33.23 |
